# Supplementary material
Source: HighWire-hosted journal article supplement (https://tech.snmjournals.org/highwire/filestream/10625/field_highwire_adjunct_files/0/264904_Supplemental_Data.pdf)
Supplement: 264904_Supplemental_Data.pdf [file 264904_Supplemental_Data.pdf]

### Search strategy:

Articles pertaining to Merkel cell carcinoma (MCC) and peptide receptor radionuclide therapy (PRRT) were searched in Google Scholar, PubMed and Scopus. Equivalent terms were covered, as well. These include:

(A) For MCC:

- a. "neuroendocrine carcinoma of the skin" OR (trabecular cancer AND skin) OR "merkel cell carcinoma" OR "merkel cell tumor" OR "merkel cell tumour" OR "merkel cell cancer" OR "small-cell carcinoma of the skin" OR "Toker tumor" OR "Toker tumour" OR "cutaneous neuroendocrine carcinoma" OR "trabecular cell carcinoma"
- b. Merkel (for hand searching in nuclear medicine journals)

(B) For PRRT:

- a. "Y-DOTATATE" OR "Y-DOTA-TATE" OR "90Y-DOTATATE" OR "90Y-DOTA-TATE" OR "[90Y]Y-DOTATATE" OR "[90Y]Y-DOTA-TATE" OR "DOTATATE yttrium Y-90" OR "DOTA-TATE yttrium Y-90" OR "Y-DOTA-TOC" OR "Y-DOTATOC" OR "90Y-DOTA-TOC" OR "90Y-DOTATOC" OR "[90Y]Y-DOTATOC" OR "[90Y]Y-DOTA-TOC"
- b. "peptide receptor radionuclide therapy" OR PRRT OR PRRT OR Lutathera OR "Lu-DOTA-TATE" OR "Lu-DOTATATE" OR "177Lu-DOTATATE" OR "177Lu-DOTA-TATE" OR "[177Lu]Lu-DOTATATE" OR "[177Lu]Lu-DOTA-TATE" OR "177Lu-DOTA-Tyr3-octreotate" OR "177Lu-DOTA-octreotate" OR "Lutetium oxodotreotide lu-177" OR "(177Lu-DOTA(Tyr3)octreotate" OR "Lutetium (177lu) oxodotreotide" OR "(177lutetium-DOTA(O)Tyr3)octreotate" OR "peptide receptor"

Hand searching of the most important nuclear medicine journals, including the JNM, was also performed using the most sensitive key word (i.e. "merkel"). No language restriction was applied and the literature was searched until 22 January 2022. Search was performed by two independent researchers (EA and SZM). In case of discrepancy, consensus method was used. To identify ongoing trials on Merkel cell carcinoma, Cochrane library and clinicaltrials.gov were also checked. We also contacted centers who have had reported somatostatin receptor (SSTR) PET imaging in MCC with a hope of finding new cases being treated with PRRT. Overall, 75 colleagues were contacted during the project in order to obtain more data. The PRISMA 2020 flow diagram is designed according to the guidelines and is shown in supplemental figure 1 (1). Schema of the case included in and excluded from the study is shown in supplemental figure 2. Protocol registration was not used for the current systematic review.

Search results were recorded using an excel file. Results retrieved from each dataset along with its unique search strategy was kept in separate spreadsheets. To remove duplicates, conditional formatting and fuzzy look-up was used. Google scholar outperformed other databases finding 7 of 10 studies (for scientometric purposes, recorded search data is available upon request from the first author).

All studies evaluating the treatment response of PRRT in MCC were included. For more information regarding the excluded MCC cases treated with PRRT and unavailable response data, the reader is referred to supplemental tables 1 and 2.

Additional data regarding overall survival of the cases (from histopathological diagnosis), Krenning score, FDG findings and MCPyV status is summarized in supplemental tables 3 and 4.

### Statistical analysis:

Kaplan-Meier curves were used to estimate the median overall survival from diagnosis/start of PRRT. For evaluation of objective response in different Krenning scores, logistic regression test was applied.

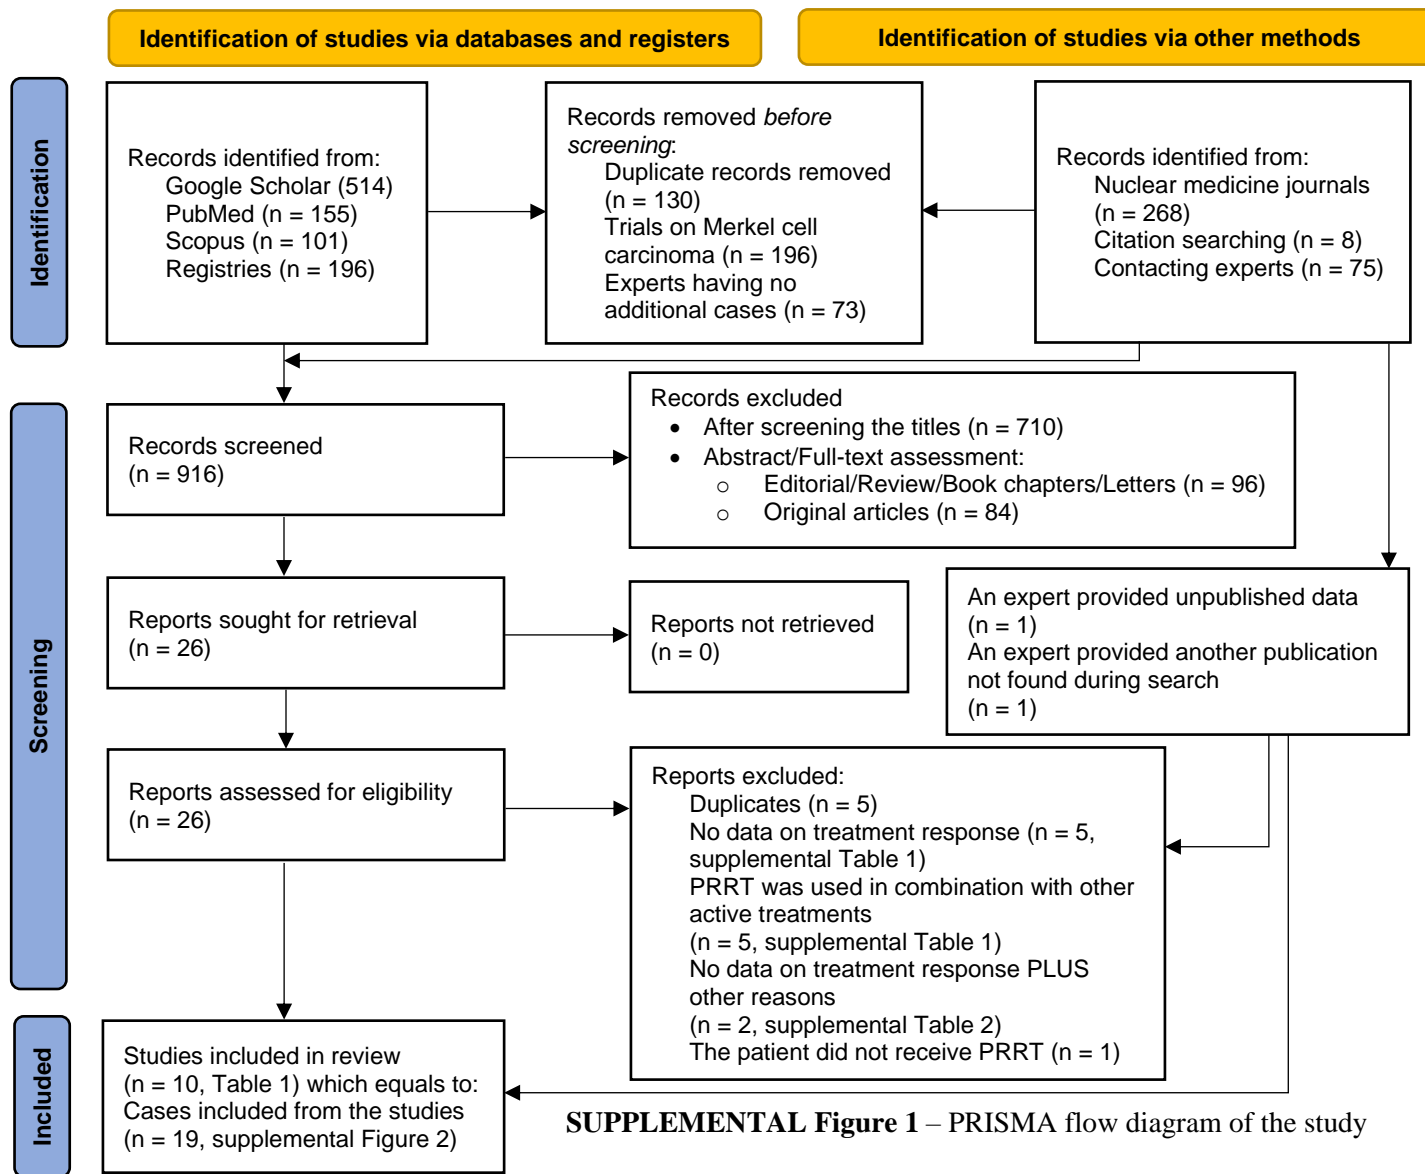

**SUPPLEMENTAL Figure 1** – PRISMA flow diagram of the study

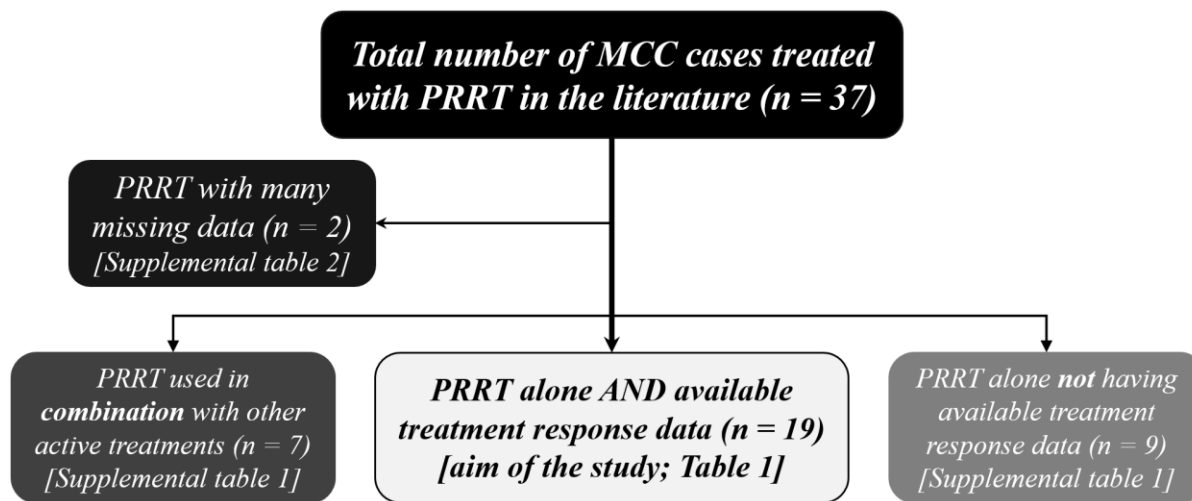

**SUPPLEMENTAL Figure 2** – Schema of the cases included in (2-10) and excluded from (11-22) the study

**SUPPLEMENTAL TABLE 1** – Studies excluded due to unavailable treatment response (number of cases = 9) or combination of PRRT with other active treatments (number of cases = 7)

| First author, Year (Reference)     | Age (Gender)                                         | Primary location (Size in cm)           | Other sites of involvement                                             | Data on PRRT (Type of radiotracer, cumulative dose, # of cycles) | Treatments prior to PRRT |      |        |      |     | Survival from start of PRRT (months) | Treatment response to PRRT |
|------------------------------------|------------------------------------------------------|-----------------------------------------|------------------------------------------------------------------------|------------------------------------------------------------------|--------------------------|------|--------|------|-----|--------------------------------------|----------------------------|
|                                    |                                                      |                                         |                                                                        |                                                                  | Surgery                  | EBRT | Chemo. | SSAs | ICI |                                      |                            |
| <b>(A) PRRT only</b>               |                                                      |                                         |                                                                        |                                                                  |                          |      |        |      |     |                                      |                            |
| Barucca, 2006 (11)                 | <u>66 (M)</u>                                        | <u>Gluteal (5)</u>                      | <u>Inguinal and abdominal LNs</u>                                      | <u><sup>90</sup>Y-DOTATOC, 2.84 GBq, 2 cycles</u>                | ✓                        | ✓    | ✓      | ✗    | ✗   | <u>NA</u>                            | <u>NA</u>                  |
|                                    | <u>57 (M)</u>                                        | <u>Gluteal (3)</u>                      | <u>Inguinal LNs</u>                                                    | <u><sup>90</sup>Y-DOTATOC, 3.36 GBq, 1 cycle</u>                 | ✓                        | ✗    | ✓      | ✗    | ✗   | <u>NA</u>                            | <u>NA</u>                  |
| Herberg, 2009 (12)                 | <u>82 (F)</u>                                        | <u>Lateral malleolus</u>                | <u>Inguinal LNs</u>                                                    | <u><sup>90</sup>Y-DOTATOC, 3.95 GBq, 2 cycles</u>                | ✓                        | ✗    | ✗      | ✗    | ✗   | <u>NA</u>                            | <u>NA</u>                  |
|                                    | <u>66 (M)*</u>                                       | <u>Thigh (Right) (5)</u>                | <u>Inguinal LNs, liver</u>                                             | <u><sup>90</sup>Y-DOTATOC, 4.44 GBq, 2 cycles</u>                | NA                       | NA   | NA     | NA   | NA  | <u>≥3</u>                            | <u>NA</u>                  |
| Cirillo, 2012 (13)                 | <u>80 (M)</u>                                        | <u>Head (0.5)</u>                       | <u>None</u>                                                            | <u><sup>177</sup>Lu-DOTATATE, 1.5 GBq, 1 cycle</u>               | ✓                        | ✓    | ✓      | ✓    | ✗   | <u>NA</u>                            | <u>NA</u>                  |
|                                    | <u>69 (M)</u>                                        | <u>NA</u>                               | <u>NA</u>                                                              | <u><sup>177</sup>Lu-DOTATATE, 7 GBq, 1 cycle</u>                 | NA                       | NA   | NA     | NA   | NA  | <u>NA</u>                            | <u>NA</u>                  |
| Hamiditabar, 2017 (14)             | <u>74 (M)</u>                                        | <u>Chest, Back</u>                      | <u>Extensive LNs (right axillary and subpectoral), Bone</u>            | <u><sup>177</sup>Lu-DOTATATE, 7.1 GBq, 1 cycle</u>               | NA                       | NA   | NA     | NA   | NA  | <u>7.9</u>                           | <u>NA</u>                  |
|                                    | <u>76 (M)</u>                                        | <u>Arm (Left forearm)</u>               | <u>Testes, cervical LNs, lymphangiosis</u>                             | <u><sup>90</sup>Y-DOTATOC, 3.0 GBq, 1 cycle</u>                  | ✗                        | ✓    | ✓      | ✗    | ✗   | <u>1</u>                             | <u>NA</u>                  |
| Würzburg center (unpublished data) | <u>75 (F)</u>                                        | <u>Facial (Left cheek)</u>              | <u>Extensive LNs (facial, cervical, parotidal)</u>                     | <u><sup>177</sup>Lu-DOTATOC, 6.1 GBq, 1 cycle</u>                | ✓                        | ✓    | ✓      | ✗    | ✓   | <u>4</u>                             | <u>NA</u>                  |
|                                    | <b>(B) PRRT in combination with other treatments</b> |                                         |                                                                        |                                                                  |                          |      |        |      |     |                                      |                            |
| Schmidt, 2012 (15)                 | <u>76 (F)</u>                                        | <u>Pharyngeal tonsil</u>                | <u>Extensive LNs (cervical, axillary), pancreatic head</u>             | <u><sup>90</sup>Y-DOTATATE, 10 GBq, 2 cycles</u>                 | ✓                        |      | ✓†     |      |     | <u>7</u>                             | <u>SD</u>                  |
|                                    | <u>67 (M)</u>                                        | <u>NA</u>                               | <u>Extensive LNs (cervical, abdominal, inguinal)</u>                   | <u><sup>177</sup>Lu-DOTATATE, 14 GBq, 2 cycles</u>               |                          | ✓†   | ✓†     |      |     | <u>8</u>                             | <u>PR</u>                  |
| Salavati, 2012 (16)                | <u>53 (M)</u>                                        | <u>Leg (Posterior thigh) (Multiple)</u> | <u>Extensive LNs (right extremity, inguinal, abdominal, thoracic?)</u> | <u><sup>177</sup>Lu-DOTATATE, 20 GBq, 2 cycles</u>               |                          |      | ✓†     |      |     | <u>7‡</u>                            | <u>PD</u>                  |
| Kasi, 2019 (17)                    | <u>83 (M)</u>                                        | <u>Shoulder</u>                         | <u>Widespread (bone, LNs, carcinomatosis, ascites)</u>                 | <u><sup>177</sup>Lu-DOTATATE, 7.4 GBq, 1 cycle</u>               | NA                       | ✗    | ✗      | ✓    | ✓†  | <u>9</u>                             | <u>Near CR</u>             |
| Ferdinandus, 2021 (18)             | <u>60 (M)</u>                                        | <u>Leg (Right thigh)</u>                | <u>Retroperitoneal LNs, bone</u>                                       | <u><sup>177</sup>Lu-DOTATATE, 14.8 GBq, 2 cycles</u>             | ✓                        | ✓    | ✓      |      | ✓†  | <u>&gt;5</u>                         | <u>PR</u>                  |
| Sindrilaru, 2021 (19)              | <u>NA</u>                                            | <u>Arm (Right elbow)</u>                | <u>LNs, distant skin, bone</u>                                         | <u><sup>177</sup>Lu-HA-DOTATATE, 10.5 GBq, 3 cycles</u>          | NA                       | NA   | NA     | NA   | ✓†  | <u>8</u>                             | <u>PR</u>                  |
|                                    | <u>NA</u>                                            | <u>NA</u>                               | <u>LNs, distant skin, bone</u>                                         | <u><sup>177</sup>Lu-HA-DOTATATE, 10.5 GBq, 3 cycles</u>          | NA                       | NA   | NA     | NA   | ✓†  | <u>10</u>                            | <u>PR</u>                  |

<sup>177</sup>Lu-HA-DOTATATE = high affinity <sup>177</sup>Lu-DOTATATE, CR = Complete response, ICI = immune checkpoint inhibitors, LN = Lymph node, NA = Not available, PR = Partial response, PD = Progressive disease, SD = Stable disease

\* Underlined data were obtained after personal communication with the corresponding authors of that article/unpublished data.

† Treatments used in combination with PRRT.

‡ Death due to other cause (obstructive uropathy)

**SUPPLEMENTAL TABLE 2** – Studies excluded due to unavailable treatment response PLUS other reasons (number of cases = 2) \*

| <b>Authors, Year<br/>(Reference)</b> | <b># of cases excluded<br/>(from total # of the<br/>cases)</b> | <b>Reasons for exclusion<br/>(other than unavailable treatment response)</b>                                                                           |
|--------------------------------------|----------------------------------------------------------------|--------------------------------------------------------------------------------------------------------------------------------------------------------|
| Stefanova et al., 2012<br>(20)       | 1 (1)                                                          | It was known that a 50-year old female was treated with 5 cycles of PRRT (10 and 20 GBq of <sup>90</sup> Y- and <sup>177</sup> Lu-PRRT, respectively). |
| Koukouraki et al.,<br>2006 (21)      | 1 (1)                                                          | It was only known that the case was a 55-year old female with primary gluteal lesion and liver metastases treated with <sup>90</sup> Y-PRRT            |

\* In the study of Epstude et al., 2013 (22), the patient did not finally receive PRRT based on personal communication with the corresponding author and therefore, not counted in this table.

**SUPPLEMENTAL TABLE 3** – Studies with available survival data (from diagnosis)

| First author, Year<br>(Reference)     | Age (Gender)    | Survival from<br>diagnosis (months) |
|---------------------------------------|-----------------|-------------------------------------|
| Meier, 2004 (2)                       | 83 (F)          | 36                                  |
| Bodei, 2004 (3)                       | <u>78 (F)</u> * | <u>41</u>                           |
| Maecke, 2005 (4)                      | 43 (F)          | <u>&gt;25</u> †                     |
| Imhof, 2011 (5)                       | <u>70 (M)</u>   | <u>18.8</u>                         |
|                                       | <u>77 (M)</u>   | <u>16</u>                           |
|                                       | <u>69 (F)</u>   | <u>4.6</u>                          |
|                                       | <u>55 (M)</u>   | <u>61.4</u>                         |
|                                       | <u>54 (F)</u>   | <u>25.2</u>                         |
|                                       | <u>66 (M)</u>   | <u>17.5</u>                         |
|                                       | <u>83 (F)</u>   | <u>&gt;33.8</u> †                   |
|                                       | <u>69 (F)</u>   | <u>15.9</u>                         |
| Cirillo, 2012 (13)                    | 80 (M)          | 17                                  |
| Villard, 2012 (6)                     | <u>76 (F)</u>   | <u>27.2</u>                         |
|                                       | <u>73 (F)</u>   | <u>22.7</u>                         |
| Schmidt, 2012 (15)                    | 76 (F)          | 7                                   |
|                                       | 67 (M)          | 11                                  |
| Salavati, 2012 (16)                   | 53 (M)          | 10                                  |
| Romer, 2014 (7)                       | <u>76 (F)</u>   | <u>8.9</u>                          |
|                                       | <u>53 (M)</u>   | <u>9.4</u>                          |
| Basu, 2015 (8)                        | 54 (M)          | >39 †                               |
| Nilica, 2016 (9)                      | <u>65 (M)</u>   | <u>45</u>                           |
| Moghadam, 2019 (10)                   | 77 (M)          | 26                                  |
| Würzburg center<br>(unpublished data) | <u>76 (M)</u>   | <u>53</u>                           |
|                                       | <u>75 (F)</u>   | <u>22</u>                           |
| Ferdinandus, 2021 (18)                | 60 (M)          | >20 †                               |
| Sindrilaru, 2021 (19)                 | NA              | 15                                  |

\* Underlined data were obtained after personal communication with the corresponding authors of that article/unpublished data.

† Lost to follow-up or unavailable data regarding survival after the given time.

**SUPPLEMENTAL TABLE 4** – Other Findings of Significance Reported in the Studies Evaluating the Usefulness of PRRT in Metastatic Merkel Cell Carcinoma

| <b>Relevant clinical question?</b>       | <b>Number of cases addressed by the relevant literature (References)</b>                                                                                                                                                                                                                                                                                                                                                                                                                                                                                                                                                                                                                                                                                                                                                                                                                                                                                                                                                                                                                                                                                                                                                                                                                  |
|------------------------------------------|-------------------------------------------------------------------------------------------------------------------------------------------------------------------------------------------------------------------------------------------------------------------------------------------------------------------------------------------------------------------------------------------------------------------------------------------------------------------------------------------------------------------------------------------------------------------------------------------------------------------------------------------------------------------------------------------------------------------------------------------------------------------------------------------------------------------------------------------------------------------------------------------------------------------------------------------------------------------------------------------------------------------------------------------------------------------------------------------------------------------------------------------------------------------------------------------------------------------------------------------------------------------------------------------|
| What was the MCPyV status of the cases?  | 1 (18): MCPyV-positive                                                                                                                                                                                                                                                                                                                                                                                                                                                                                                                                                                                                                                                                                                                                                                                                                                                                                                                                                                                                                                                                                                                                                                                                                                                                    |
| How was the Krenning score of the cases? | 25 (3-12, 16, 18, and Würzburg center (unpublished data)) <ul style="list-style-type: none"> <li>- grade I (n = 2) (5, 7)</li> <li>- grade II (n = 5) (Würzburg center (unpublished data), 6, 7, 11)</li> <li>- grade III (n = 14) (4-6, 8, 9, 11, 12)</li> <li>- grade IV (n = 4) (3, 10, 16, 18)</li> </ul>                                                                                                                                                                                                                                                                                                                                                                                                                                                                                                                                                                                                                                                                                                                                                                                                                                                                                                                                                                             |
| Which studies reported FDG findings?     | 5 (9, 11, 16, and Würzburg center (unpublished data)) <ul style="list-style-type: none"> <li>- Nilica et al. (9): Hypermetabolic lesions in the right axilla, cerebral left parietal, peritoneal near right colon flexure.</li> <li>- Barucca et al (11): Case #2 (57-year old male): Superior mesenteric conglomerated lymph nodes.</li> <li>- Salavati et al. (16): Hypermetabolic lesions in the right calf (SUVmax 11.4), and a chain of FDG avid lymph nodes (SUVmax 16.5), extending from the right inguinal to the right iliac and para-aortic region.               <ul style="list-style-type: none"> <li>- Würzburg center (unpublished data):                   <ol style="list-style-type: none"> <li>1. Case #1 (76-year old male): Hypermetabolic lesions supraclavicular left (SUVmax 6.2), in the left shoulder (SUVmax 5.4), right humerus (SUVmax 3.4), left humerus and forearm (SUVmax 3.5), mediastinal (SUVmax 5.9), sternal (SUVmax 2.8), right hilum (SUVmax 3.0) and left femur (SUVmax 3.2) (concordant to SSTR).</li> <li>2. Case #2 (75-year old female): Hypermetabolic lesions in the region of the left cheek, the left orbit (SUVmax 5.2), submental (SUVmax 4.9) and left mandible (SUVmax 7.3) (concordant to SSTR).</li> </ol> </li> </ul> </li> </ul> |

MCPyV = Merkel cell polyomavirus

## REFERENCES

1. Page MJ, McKenzie JE, Bossuyt PM, et al. The PRISMA 2020 statement: an updated guideline for reporting systematic reviews. *Syst Rev.* 2021;10:89.
2. Meier G, Waldherr C, Herrmann R, Maecke H, Mueller-Brand J, Pless M. Successful targeted radiotherapy with <sup>90</sup>Y-DOTATOC in a patient with Merkel cell carcinoma. A case report. *Oncology.* 2004;66:160-163.
3. Bodei L, Cremonesi M, Grana C, et al. Receptor radionuclide therapy with <sup>90</sup>Y-[DOTA] 0-Tyr 3-octreotide (<sup>90</sup>Y-DOTATOC) in neuroendocrine tumors. *Eur J Nucl Med Imaging.* 2004;31:1038-1046.
4. Maecke HR. Radiolabeled peptides in nuclear oncology: Influence of peptide structure and labeling strategy on pharmacology. In: Bogdanov A, Licha K. *Molecular imaging: an essential tool in preclinical research, diagnostic imaging, and therapy.* Berlin: Springer; 2005:43-72.
5. Imhof A, Brunner P, Marincek N, et al. Response, survival, and long-term toxicity after therapy with the radiolabeled somatostatin analogue [<sup>90</sup>Y-DOTA]-TOC in metastasized neuroendocrine cancers. *J Clin Oncol.* 2011;29:2416-2423.
6. Villard L, Romer A, Marincek N, et al. Cohort study of somatostatin-based radiopeptide therapy with [<sup>90</sup>Y-DOTA]-TOC versus [<sup>90</sup>Y-DOTA]-TOC plus [<sup>177</sup>Lu-DOTA]-TOC in neuroendocrine cancers. *J Clin Oncol.* 2012;30:1100-1106.
7. Romer A, Seiler D, Marincek N, et al. Somatostatin-based radiopeptide therapy with [<sup>177</sup>Lu-DOTA]-TOC versus [<sup>90</sup>Y-DOTA]-TOC in neuroendocrine tumors. *Eur J Nucl Med Mol Imaging.* 2014;41:214-222.
8. Basu S, Ranade R. Favorable response of metastatic Merkel cell carcinoma to targeted <sup>177</sup>Lu-DOTATATE therapy: will PRRT evolve to become an important approach in receptor-positive cases?. *J Nucl Med Technol.* 2016;44:85-87.
9. Nilica B. Peptide receptor radionuclide therapy in non-neuroendocrine tumors: a field report. *Eur J Nucl Med Mol Imaging.* 2016;43:S223.
10. Moghadam SZ, Divband G, Shakeri S, Aryana K. Favorable response after only one cycle of peptide receptor radionuclide therapy with <sup>177</sup>Lu-DOTATATE in a patient with metastatic Merkel cell carcinoma. *Clin Nucl Med.* 2019;44:650-652.
11. Barucca S, Berbellini A, Ancidei C, et al. Radionuclide dosimetry in <sup>90</sup>Y-DOTATOC therapy: preliminary report. *Eur J Nucl Med Mol Imaging.* 2006;33:S180.
12. Herberg A, Murè G, Militano V, Lo Gullo R, Paratore R, Baldari S. <sup>90</sup>Y-DOTATOC and/or <sup>111</sup>In-Pentetreotide in the treatment of the somatostatin expressing tumors (SSTR): personal experience. *Eur J Nucl Med Mol Imaging.* 2009;36:S418.



13. Cirillo F, Vismarra M, Cafaro I, Martinotti M. Merkel cell carcinoma: a retrospective study on 48 cases and review of literature. *J Oncol*. 2012;749030.
14. Hamiditabar M, Ali M, Roys J, et al. Peptide receptor radionuclide therapy with <sup>177</sup>Lu-Octreotate in patients with somatostatin receptor expressing neuroendocrine tumors: six years' assessment. *Clin Nucl Med*. 2017;42:436-443.
15. Schmidt MC, Uhrhan K, Markiefka B, et al. (68)Ga-DotaTATE PET-CT followed by peptide receptor radiotherapy in combination with capecitabine in two patients with Merkel cell carcinoma. *Int J Clin Exp Med*. 2012;5:363-366.
16. Salavati A, Prasad V, Schneider CP, Herbst R, Baum RP. Peptide receptor radionuclide therapy of Merkel cell carcinoma using (177)lutetium-labeled somatostatin analogs in combination with radiosensitizing chemotherapy: a potential novel treatment based on molecular pathology. *Ann Nucl Med*. 2012;26:365-369.
17. Kasi PM, Sharma A, Jain MK. Expanding the indication for novel theranostic <sup>177</sup>Lu-Dotatate peptide receptor radionuclide therapy: proof-of-concept of PRRT in Merkel cell cancer. *Case Rep Oncol*. 2019;12:98-103.
18. Ferdinandus J, Fendler WP, Lueckerath K, et al. Response to combined peptide receptor radionuclide therapy and checkpoint immunotherapy with ipilimumab plus nivolumab in metastatic Merkel cell carcinoma. *J Nucl Med*. September 02, 2021 [Epub a head of print].
19. Sindrilaru A, Aicher A, Crisan D, Prasad V. Use of the low-dose hyperfractionated <sup>177</sup>Lu-HA-DOTATATE peptide receptor radionuclide therapy in patients with immunotherapy-refractory Merkel cell carcinoma-testing of the therapeutic concept in two patients with metastatic Merkel cell carcinoma. *J Dtsch Dermatol Ges*. 2021;19: 20-21.
20. Stefanova M, Kratochwil C, Schwartz L, Haberkorn U, Giesel F. Impact of normal tissue uptake using <sup>68</sup>Ga DOTATOC-PET/CT in patients with neuroendocrine tumor: a follow-up study. *Insights Imaging*. 2012;3:S160-S161.
21. Koukouraki S, Strauss LG, Georgoulas V, et al. Evaluation of the pharmacokinetics of <sup>68</sup>Ga-DOTATOC in patients with metastatic neuroendocrine tumors scheduled for <sup>90</sup>Y-DOTATOC therapy. *Eur J Nucl Med Mol Imaging*. 2006;33:460-466.
22. Epstude M, Tornquist K, Riklin C, et al. Comparison of (18)F-FDG PET/CT and (68)Ga-DOTATATE PET/CT imaging in metastasized Merkel cell carcinoma. *Clin Nucl Med*. 2013;38:283-284.
